# Supplementary material for: Machine learning prediction of physical properties of lignin derived porous carbon via catalytic pyrolysis
Source: Royal Society of Chemistry journal article supplement (doi:10.1039/d4gc05515b), 2025-01-01
Supplement: d4gc05515b1.pdf [file d4gc05515b1.pdf]

## Supporting Information

# **Machine Learning Prediction of Physical Properties of Lignin Derived Porous Carbon via Catalytic Pyrolysis**

Zihao Xie<sup>a</sup>, Yue Cao<sup>\*a</sup>, Zhicheng Luo<sup>\*a</sup>

<sup>a</sup>MOE Key laboratory of Energy Thermal Conversion & Control, School of Energy and Environment, Southeast University, Nanjing 210096, China. Email: [ycao@seu.edu.cn](mailto:ycao@seu.edu.cn) (Yue Cao), [zluo@seu.edu.cn](mailto:zluo@seu.edu.cn) (Zhicheng Luo)

Code availability: The dataset and codes to perform machine learning and predict SSA, TPV, and MP of lignin-derived porous carbon are available at <https://github.com/Zihao-Xie77/Machine-learning-for-physical-properties-of-LDPC>.

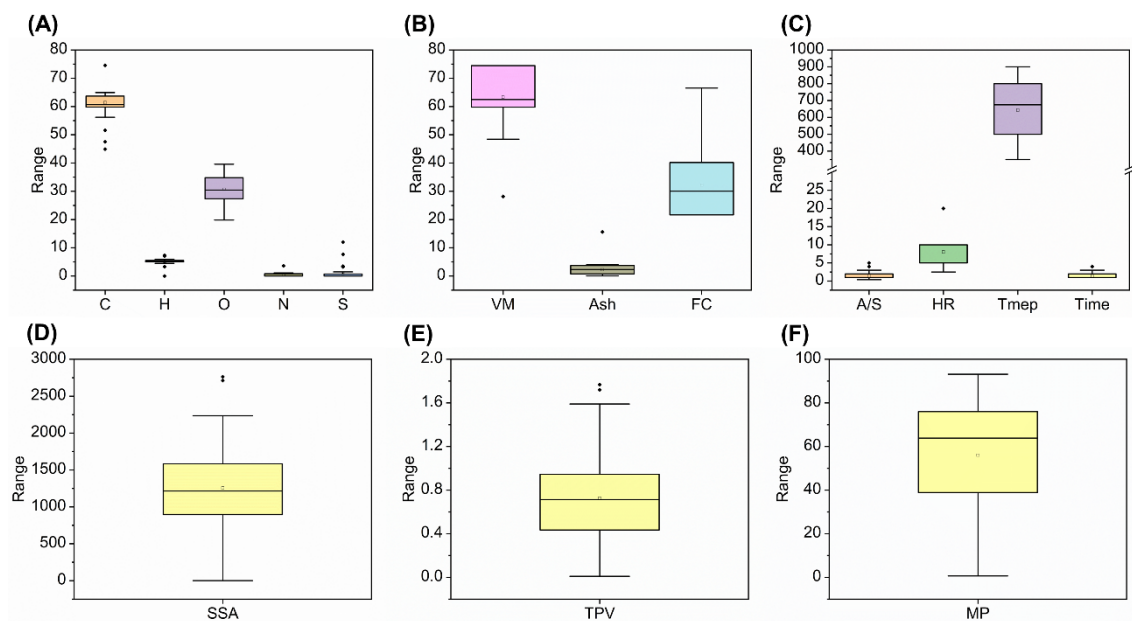

**Fig. S1** The boxplot of input features and output targets of (A) elemental composition (C, H, O, N, S); (B) proximate composition (VM, Ash, FC); (C) pyrolysis condition (HR, Temp, Time) and chemical activators (A/S); (D) SSA; (E) TPV; (F) MP.

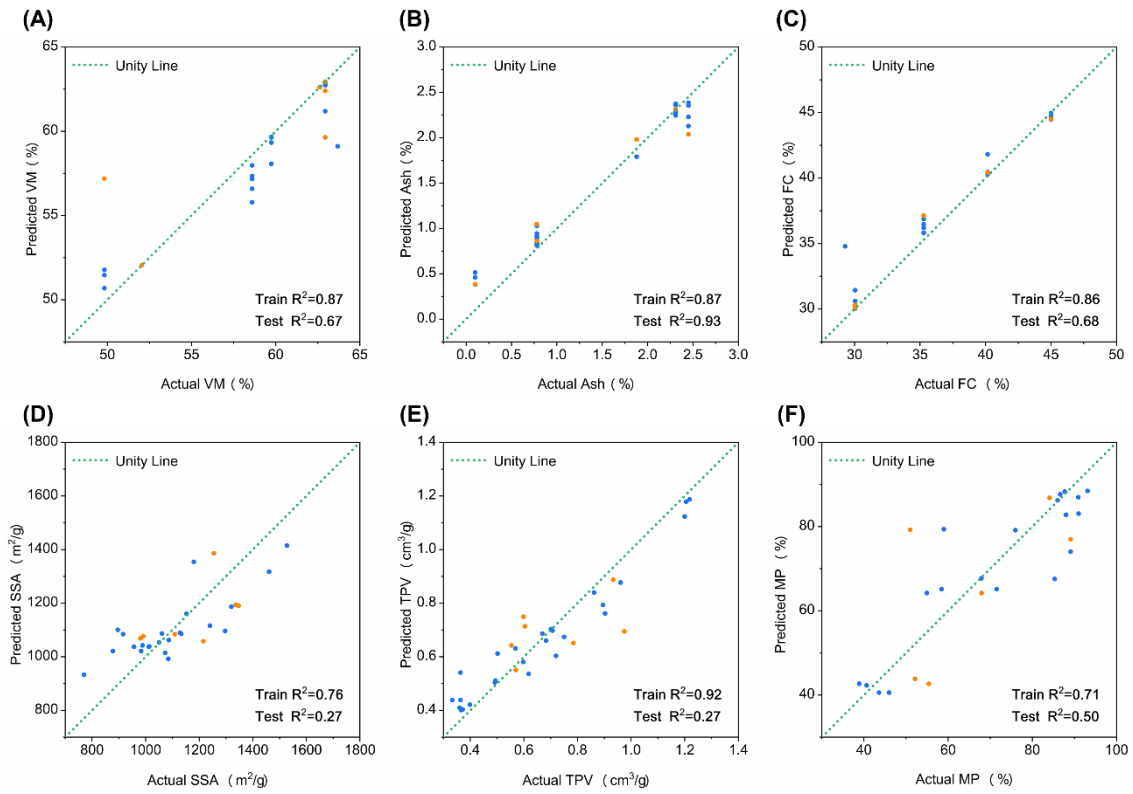

**Fig. S2** Comparison of predicted and actual values using pre-trained interpolation model for (A, B, C) VM, Ash and FC; (D, E, F) SSA, TPV and MP.

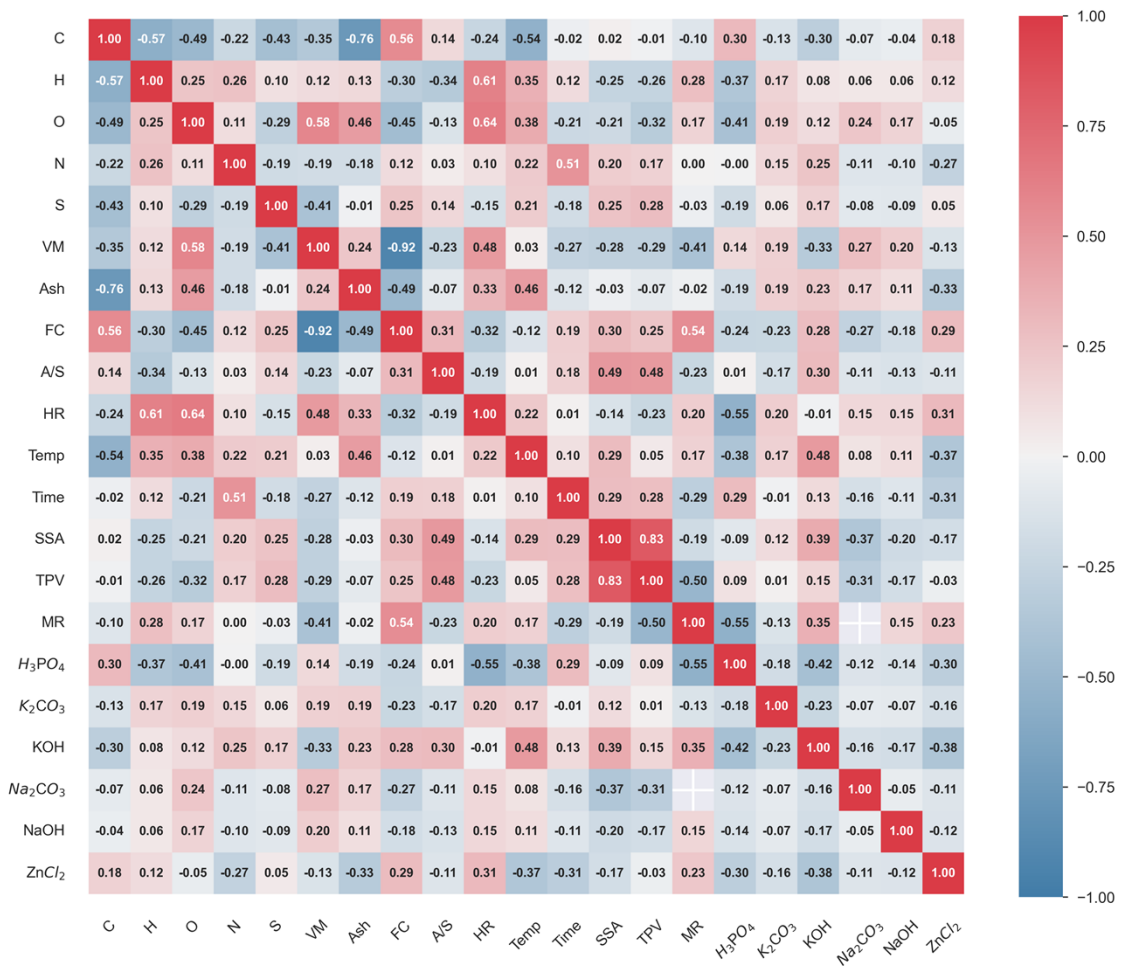

Fig. S3 Pearson correlation matrix between any two features in the original dataset.

**Table S1** Information of references for the original used for the hybrid machine learning framework

| No. | Lignin Type                 | Chemical Agent                                                                      | Ref. |
|-----|-----------------------------|-------------------------------------------------------------------------------------|------|
| 1   | Black liquor lignin         | KOH/ZnCl <sub>2</sub>                                                               | 1    |
| 2   | Kraft softwood lignin       | KOH                                                                                 | 2    |
| 3   | Sodium lignosulfonate       | H <sub>3</sub> PO <sub>4</sub>                                                      | 3    |
| 4   | lignosulfonate              | K <sub>2</sub> CO <sub>3</sub>                                                      | 4    |
| 5   | Kraft lignin                | KOH                                                                                 | 5    |
| 6   | Kraft lignin                | KOH/ H <sub>3</sub> PO <sub>4</sub> / K <sub>2</sub> CO <sub>3</sub>                | 6    |
| 7   | Alkali lignin               | KOH                                                                                 | 7    |
| 8   | Sodium lignosulfonate       | KOH                                                                                 | 8    |
| 9   | Sodium lignosulfonate       | KOH                                                                                 | 9    |
| 10  | Alkali lignin               | KOH/NaOH                                                                            | 10   |
| 11  | Alkali lignin               | KOH                                                                                 | 11   |
| 12  | Alkali lignin               | H <sub>3</sub> PO <sub>4</sub>                                                      | 12   |
| 13  | sodium lignosulfonate       | ZnCl <sub>2</sub>                                                                   | 13   |
| 14  | Alkali lignin               | KOH                                                                                 | 14   |
| 15  | Enzymatic hydrolysis lignin | ZnCl <sub>2</sub> / K <sub>2</sub> CO <sub>3</sub>                                  | 15   |
| 16  | Alkaline lignin             | KOH                                                                                 | 16   |
| 17  | Enzymatic hydrolysis lignin | KOH/ H <sub>3</sub> PO <sub>4</sub> / K <sub>2</sub> CO <sub>3</sub>                | 17   |
| 18  | Sodium lignosulfonate       | KOH                                                                                 | 18   |
| 19  | Lignin                      | ZnCl <sub>2</sub> / K <sub>2</sub> CO <sub>3</sub> / H <sub>3</sub> PO <sub>4</sub> | 19   |
| 20  | Lignin                      | K <sub>2</sub> CO <sub>3</sub>                                                      | 20   |
| 21  | Bioethanol lignin           | KOH/NaOH                                                                            | 21   |
| 22  | Sodium lignosulphonate      | KOH                                                                                 | 22   |
| 23  | Sodium lignosulfonate       | KOH                                                                                 | 23   |
| 24  | Enzymatic hydrolysis lignin | KOH                                                                                 | 24   |
| 25  | Kraft lignin                | KOH                                                                                 | 25   |
| 26  | Lignin                      | KOH                                                                                 | 26   |
| 27  | Akali lignin                | KOH                                                                                 | 27   |

|    |        |                                                         |    |
|----|--------|---------------------------------------------------------|----|
| 28 | Lignin | ZnCl <sub>2</sub>                                       | 28 |
| 29 | Lignin | H <sub>3</sub> PO <sub>4</sub>                          | 29 |
| 30 | Lignin | ZnCl <sub>2</sub> / K <sub>2</sub> CO <sub>3</sub> /KOH | 30 |
| 31 | Lignin | KOH                                                     | 31 |
| 32 | Lignin | KOH                                                     | 32 |

---

**Table S2** Description of dataset features.

| Feature                                    | Abbreviation | Unit               |
|--------------------------------------------|--------------|--------------------|
| Carbon content of lignin                   | C            | %                  |
| Hydrogen content of lignin                 | H            | %                  |
| Oxygen content of lignin                   | O            | %                  |
| Nitrogen content of lignin                 | N            | %                  |
| Ash proportion of lignin                   | S            | %                  |
| Volatile matter proportion of lignin       | VM           | %                  |
| Ash proportion of lignin                   | Ash          | %                  |
| Fixed carbon proportion of lignin          | FC           | %                  |
| Hate rate during the pyrolysis             | HR           | (°C/min)           |
| Highest temperature during the pyrolysis   | Temp         | °C                 |
| Mass ratio of lignin to chemical activator | A/S          | -                  |
| Using chemical activator                   | Agent        | -                  |
| Specific surface area of the porous carbon | SSA          | m <sup>2</sup> /g  |
| Total pore volume of the porous carbon     | TPV          | cm <sup>3</sup> /g |
| Microporosity of the porous carbon         | MP           | %                  |



**Table S3** Statistical summary of input features and output targets of the original dataset

| I/O    | Type of features         | feature                  | Min   | Max    | Mean    | SD         | No. of samples<br>(% of total samples) |
|--------|--------------------------|--------------------------|-------|--------|---------|------------|----------------------------------------|
| Input  | Elemental<br>composition | C (%)                    | 44.90 | 74.56  | 61.41   | 5.38       | 112 (100%)                             |
|        |                          | H (%)                    | 0     | 7.34   | 4.87    | 1.50       | 112 (100%)                             |
|        |                          | O (%)                    | 19.82 | 39.57  | 30.66   | 3.81       | 112 (100%)                             |
|        |                          | N (%)                    | 0     | 3.60   | 0.48    | 0.77       | 112 (100%)                             |
|        |                          | S (%)                    | 0     | 12     | 0.95    | 2.53       | 112 (100%)                             |
|        | Proximate<br>composition | VM (%)                   | 28.14 | 74.46  | 63.30   | 9.93       | 90 (80.36%)                            |
|        |                          | Ash (%)                  | 0.04  | 15.62  | 2.29    | 2.05       | 90 (80.36%)                            |
|        |                          | FC (%)                   | 21.65 | 66.52  | 32.26   | 9.75       | 90 (80.36%)                            |
|        | Pyrolysis<br>condition   | HR (°C/min)              | 2.5   | 20     | 8.05    | 2.98       | 112 (100%)                             |
|        |                          | Temp (°C)                | 350   | 900    | 643.30  | 157.47     | 112 (100%)                             |
|        |                          | Time (h)                 | 1     | 4      | 1.42    | 0.56       | 112 (100%)                             |
|        | Chemical<br>activators   | A/S                      | 0.4   | 5      | 1.45    | 0.85       | 112 (100%)                             |
| Agent  |                          | -                        | -     | -      | -       | 112 (100%) |                                        |
| Output |                          | SSA (m <sup>2</sup> /g)  | 1.4   | 2762.5 | 1256.15 | 552.04     | 101 (90.18%)                           |
|        |                          | TPV (cm <sup>3</sup> /g) | 0.01  | 0.45   | 0.73    | 0.38       | 112 (100%)                             |
|        |                          | MP (%)                   | 0.66  | 93.14  | 56.01   | 26.75      | 73 (65.18%)                            |

**Table S4** Performance of the pre-trained interpolation model.

| Target | R <sup>2</sup> |      | RMSE   |        | Unit               |
|--------|----------------|------|--------|--------|--------------------|
|        | Train          | Test | Train  | Test   |                    |
| VM     | 0.87           | 0.67 | 3.78   | 6.81   | %                  |
| Ash    | 0.87           | 0.93 | 0.44   | 0.22   | %                  |
| FC     | 0.86           | 0.68 | 4.03   | 6.84   | %                  |
| SSA    | 0.76           | 0.27 | 275.25 | 120.98 | m <sup>2</sup> /g  |
| TPV    | 0.92           | 0.27 | 0.19   | 0.14   | cm <sup>3</sup> /g |
| MP     | 0.71           | 0.50 | 15.48  | 14.59  | %                  |

$$y = B1x + B2x^2 + B3x^3 + \text{Intercept}$$

Note: The fitting lines are all fitted using polynomials, which are completed within a cubic polynomial. The formula for cubic polynomial fitting is shown in the above equation

**Table S5** The formula of all fitted lines of top four important input features on each target

| Target | Feature | B1     | B2      | B3    | Intercept | R <sup>2</sup> |
|--------|---------|--------|---------|-------|-----------|----------------|
| SSA    | A/S     | 167.26 | -32.65  | -     | 68.59     | 0.87           |
|        | Temp    | 157.98 | -101.93 | -     | 64.22     | 0.78           |
|        | C       | -47.5  | 81.03   | 27.53 | -23.91    | 0.96           |
|        | Time    | 44.77  | -6.37   | -     | -9.39     | 0.99           |
| TPV    | C       | -0.05  | 0.09    | 0.03  | -0.04     | 0.94           |
|        | Temp    | 0.10   | -0.03   | 0.018 | -0.047    | 0.79           |
|        | A/S     | 0.20   | -0.03   | -     | 0.01      | 0.84           |
|        | VM      | -0.07  | -0.01   | -     | 0.02      | 0.81           |
| MP     | A/S     | -6.09  | 4.39    | -     | -3.25     | 0.73           |
|        | Temp    | 5.86   | -0.57   | -3.89 | 1.47      | 0.61           |
|        | Ash     | 16.93  | 12.47   | -     | -6.20     | 0.99           |
|        | Time    | -1.99  | 0.42    | -     | -0.13     | 0.98           |

## References

1. J. Zhao, W. Zhang, D. Shen, H. Zhang and Z. Wang, *Journal of the Energy Institute*, 2023, **107**, 101179.
2. L. Yu, L. Liang, I. Bajaj, K. Seabright, D. J. Keffer, I. N. Ivanov, H. Chen, S. Dai, A. J. Ragauskas, C. T. Maravelias and D. P. Harper, *Carbon*, 2023, **213**, 118285.
3. L. Wang, L. Xie, J. Wu, X. Li, H. Ma and J. Zhou, *Renewable Energy*, 2022, **191**, 639-648.
4. J. Wang, D. Fan, L. Zhang, D. Yang, X. Qiu and X. Lin, *Chemical Engineering Journal*, 2023, **454**, 139789.
5. M. Li, X. Liu, C. Sun, L. Stevens and H. Liu, *Journal of Environmental Chemical Engineering*, 2022, **10**, 107471.
6. Z. Zapata-Benabithé, C. D. Castro and G. Quintana, *Journal of Materials Science-Materials in Electronics*, 2022, **33**, 7031-7047.
7. H. Liu, H. Chen, K. Shi, F. Zhang, S. Xiao, L. Huang and H. Zhu, *Industrial Crops and Products*, 2022, **187**, 115519.
8. S. Zhu, J. Xu, W. Yu, Y. Kuang, B. Wang, G. Ying, J. Li, Z. Cheng, J. Li and K. Chen, *Industrial Crops and Products*, 2022, **187**, 115314.
9. S. Zhu, J. Xu, B. Wang, J. Xie, G. Ying, J. Li, Z. Cheng, J. Li and K. Chen, *Journal of Colloid and Interface Science*, 2022, **625**, 158-168.
10. D. Guo, D. Hu, Z. Yan, K. Yuan, L. Sha, H. Zhao, J. Chen and B. Liu, *Microporous and Mesoporous Materials*, 2021, **326**, 111340.
11. D. C. Liu, W. L. Zhang, D. B. Liu, J. Yang, J. Yin and H. B. Lin, *Journal of Materials Science-Materials in Electronics*, 2021, **32**, 7009-7018.
12. Z. Liao, Y.-H. Zhu, G.-T. Sun, L. Qiu and M.-Q. Zhu, *Industrial Crops and Products*, 2022, **175**, 114266.
13. F. Fu, B. Zhao, D. Yang, H. Wang, M. Yan, Z. Li, Y. Qin and X. Qiu, *ACS Applied Energy Materials*, 2021, **4**, 13617-13626.
14. B. Zhang, D. Yang, X. Qiu, Y. Qian, M. Yan and Q. Li, *Journal of Industrial and Engineering Chemistry*, 2020, **82**, 220-227.
15. Y. Xi, S. Huang, D. Yang, X. Qiu, H. Su, C. Yi and Q. Li, *Green Chemistry*, 2020, **22**, 4321-4330.
16. N. Zhang and Y. Shen, *Bioresource Technology*, 2019, **284**, 325-332.
17. Y. Xi, D. Yang, X. Qiu, H. Wang, J. Huang and Q. Li, *Industrial Crops and Products*, 2018, **124**, 747-754.
18. J. Dai, A. Xie, R. Zhang, W. Ge, Z. Chang, S. Tian, C. Li and Y. Yan, *Journal of Molecular Liquids*, 2018, **256**, 203-212.
19. C. Fernandez-Ruiz, J. Bedia, P. Bonal, J. J. Rodriguez and L. M. Gómez-Sainero, *Catalysis Science & Technology*, 2018, **8**, 3926-3935.
20. Y. Zhang, B. Yu, J. Zhang, X. Ding, J. Zeng, M. Chen and C. Wang, *ChemElectroChem*, 2018, **5**, 2142-2149.
21. D.-W. Lee, M.-H. Jin, J.-H. Park, Y.-J. Lee and Y.-C. Choi, *ACS Sustainable Chemistry & Engineering*, 2018, **6**, 10454-10462.
22. Y. Chen, G. Zhang, J. Zhang, H. Guo, X. Feng and Y. Chen, *Journal of Materials Science & Technology*, 2018, **34**, 2189-2196.
23. J. Tian, H. Zhang, Z. Liu, G. Qin and Z. Li, *International Journal of Hydrogen Energy*, 2018, **43**,

- 1596-1605.
24. N. Guo, M. Li, X. Sun, F. Wang and R. Yang, *Green Chemistry*, 2017, **19**, 2595-2602.
  25. M. Klose, R. Reinhold, F. Logsch, F. Wolke, J. Linnemann, U. Stoeck, S. Oswald, M. Uhlemann, J. Balach, J. Markowski, P. Ay and L. Giebeler, *ACS Sustainable Chemistry & Engineering*, 2017, **5**, 4094-4102.
  26. Z. Z. Chang, B. J. Yu and C. Y. Wang, *Journal of Solid State Electrochemistry*, 2016, **20**, 1405-1412.
  27. W. Zhang, H. Lin, Z. Lin, J. Yin, H. Lu, D. Liu and M. Zhao, *ChemSusChem*, 2015, **8**, 2114-2122.
  28. E. Gonzalez-Serrano, T. Cordero, J. Rodríguez-Mirasol and J. J. Rodríguez, *Industrial & Engineering Chemistry Research*, 1997, **36**, 4832-4838.
  29. Z. Yang, R. Gleisner, D. H. Mann, J. Xu, J. Jiang and J. Y. Zhu, *Polymers*, 2020, **12**, 2829.
  30. Y. Wu, J.-P. Cao, Z.-Q. Hao, X.-Y. Zhao, Q.-Q. Zhuang, J.-S. Zhu, X.-Y. Wang and X.-Y. Wei, *International Journal of Electrochemical Science*, 2017, **12**, 7227-7239.
  31. X.-F. Li, Q. Xu, Y. Fu and Q.-X. Guo, *Environmental Progress & Sustainable Energy*, 2014, **33**, 519-526.
  32. M. Myglovets, O. I. Poddubnaya, O. Sevastyanova, M. E. Lindström, B. Gawdzik, M. Sobiesiak, M. M. Tsyba, V. I. Sapsay, D. O. Klymchuk and A. M. Puziy, *Carbon*, 2014, **80**, 771-783.
